# Supplementary material for: Prognostic value of apparent diffusion coefficient in neuroendocrine carcinomas of the uterine cervix
Source: PeerJ. 2023 Mar 31;11:e15084. doi: 10.7717/peerj.15084 (PMC10069420; doi:10.7717/peerj.15084)
Supplement: Supplemental Information 1 [file peerj-11-15084-s001.xlsx]

## Sheet: Sheet1
No.	adc mean	adc mean：1≤700；2＞700	adc min	adc min：1＜680；2≥680	adc max	adc max：1≤1032；2＞1032	FIGO stage 2009	FIGO stage 2018	age	tumor size	survival：alive=0；dead=1；	deat time	end time	OS(month）	time at diagonose	PFS：progressio=1，progression-free=0	PFS(month)	Cycle of chemotherapy
1	524	1	315	1	695	1	IIA2	IIA2	44	4.5	0		2020-06-14	134.833	2009-05-18	0	134.833	4
2	653	1	541	1	813	1	IIA1	IIA1	42	3.5	1	2010-07-20	2010-07-20	14.5	2009-05-11	1	13.5	1
3	969	2	831	2	1150	2	IB1	IB2	39	3.5	0		2020-06-14	134.367	2009-06-01	0	134.367	4
4	75	1	674	1	866	1	IIB	IIB	62	4.5	1	2009-12-09	2009-12-09	4.66667	2009-07-22	0	74.0667	2
5	603	1	526	1	725	1	IIIB	IIIC1	45	5	0		2020-06-14	128.267	2009-12-01	1	4.66667	6
6	547	1	449	1	910	1	IIIB	IIIC1	48	6	1	2013-07-23	2013-07-23	40.3	2010-04-01	1	16.5	4
7	625	1	508	1	807	1	IIB	IIB	45	6	0		2020-06-14	123.533	2010-04-22	1	10.3667	6
8	592	1	411	1	805	1	IVB	IVB	78	4.5	1	2012-06-15	2012-06-15	24.8333	2010-06-01	1	25.8	2
9	1160	2	1060	2	1310	2	IIA1	IIA1	35	3.5	0		2019-06-05	102.7	2010-12-28	0	123.533	2
10	581	1	475	1	723	1	IIB	IIB	50	5	1	2014-04-15	2014-04-15	39.4	2011-01-19	1	3.26667	7
11	444	1	257	1	727	1	IIb	IIb	33	5	0		2019-06-05	100.6	2011-03-01	1	26.2667	1
12	629	1	550	1	824	1	IB2	IIIC1	32	4.5	1	2012-08-15	2012-08-15	16.1	2011-04-20	0	69.2667	7
13	608	1	500	1	855	1	IVB	IVB	56	6	1	2012-01-30	2012-01-30	5.03333	2011-09-01	1	43.8	4
14	1630	2	1520	2	1760	2	IIB	IIB	45	4.5	0		2020-06-14	106.6	2011-09-12	1	14.9	6
15	515	1	451	1	649	1	IIA2	IIA2	66	4.5	1	2013-12-15	2013-12-15	25.3333	2011-11-16	1	8.9	4
16	704	2	570	1	894	1	IIB	IIIC1	44	7	0		2020-06-14	103.3	2011-12-20	1	7.53333	3
17	761	2	629	1	998	1	IIB	IIB	55	5	0		2020-06-14	100.567	2012-03-11	0	102.7	5
18	660	1	523	1	877	1	IIA1	IIA1	40	3.5	1	2017-03-08	2017-03-08	60.4333	2012-03-21	1	27.1	2
19	862	2	680	2	1120	2	IIA1`	IIA1	61	3.5	1	2013-07-15	2013-07-15	15.6667	2012-04-01	1	6.3	6
20	700	1	621	1	797	1	IIB	IIIC1	46	6	1	2015-04-30	2015-04-30	26.5333	2013-02-23	1	13.4333	5
21	510	1	433	1	699	1	IIIA	IIIA	63	2	0		2020-06-14	88.3	2013-03-14	0	58.6667	6
22	832	2	741	2	1050	2	IB2	IB3	48	4.2	0		2020-06-14	84.7667	2013-06-28	0	56.4333	0
23	704	2	591	1	938	1	IIA2	IIA2	48	5	0		2020-06-14	84.4333	2013-07-08	1	6.83333	0
24	1470	2	1240	2	1670	2	IB2	IB3	45	4.2	0		2020-06-14	79.9	2013-11-21	0	53.1333	4
25	838	2	694	2	996	1	IVB	IVB	63	4.5	1	2016-03-02	2016-03-02	27.3333	2013-12-03	0	100.6	6
26	865	2	813	2	969	1	IIA2	IIA2	57	5	1	2018-07-23	2018-07-23	55.8667	2013-12-20	0	51.2	4
27	455	1	420	1	576	1	IIB	IIB	38	4.5	0		2020-06-14	76.6333	2014-02-27	0	50.8333	7
28	460	1	372	1	625	1	IIB	IIB	43	6.5	0		2020-06-14	75.7	2014-03-27	1	16.1	8
29	1070	2	934	2	1270	2	IIA2	IIA2	41	4.5	0		2020-06-14	74.0667	2014-05-15	1	24.8667	6
30	771	2	671	1	939	1	IIA2	IIIC1	32	4.5	1	2016-08-30	2016-08-30	27.7	2014-05-22	0	46.8667	8
31	795	2	603	1	934	1	IIA2	IIA2	50	5	1	2015-05-15	2015-05-15	10.3	2014-07-10	1	5.03333	2
32	627	1	580	1	688	1	IIIA	IIIC2	48	6	1	2015-08-31	2015-08-31	12.5333	2014-08-20	0	46.0667	6
33	407	1	274	1	530	1	IIB	IIIC1	47	4.3	1	2017-05-15	2017-05-15	33.2333	2014-08-22	1	16.6667	4
34	1410	2	1350	2	1480	2	IB1	IB2	68	2	0		2020-06-14	69.2667	2014-10-06	0	106.6	1
35	618	1	460	1	863	1	IIB	IIB	62	4.5	1	2018-05-30	2018-05-30	43.8	2014-10-24	1	21.2	9
36	504	1	442	1	622	1	IIA2	IIA2	42	5	1	2016-03-30	2016-03-30	14.9	2015-01-08	0	103.3	4
37	706	2	559	1	952	1	IVB	IVB	52	5	1	2017-03-15	2017-03-15	23.1333	2015-04-21	0	44.9667	8
38	383	1	241	1	476	1	IIB	IIIC1	63	4.5	1	2016-03-25	2016-03-25	11.5	2015-04-15	1	27.1667	5
39	581	1	541	1	702	1	IIA2	IIA2	50	5	1	2016-12-15	2016-12-15	19.6333	2015-05-06	1	15.4333	6
40	525	1	387	1	772	1	IIIA	IIIA	42	6	1	2017-04-15	2017-04-15	21.1667	2015-07-20	0	40.8	2
41	529	1	456	1	700	1	IIA2	IIIC1	39	5	0		2020-06-14	58.6667	2015-08-20	1	19.9667	8
42	998	2	942	2	1100	2	IIA1	IIA1	50	3	0		2020-06-14	56.4333	2015-10-26	1	9.46667	7
43	995	2	910	2	1032	1	IIA1	IIA1	60	1.1	1	2017-05-15	2017-05-15	17.2333	2015-12-15	1	18.5667	3
44	788	2	697	2	951	1	IIB	IIB	61	3	0		2020-06-14	53.1333	2016-02-02	1	16.2667	7
45	1190	2	1090	2	1370	2	IB1	IB2	47	3.5	0		2020-06-14	51.2	2016-03-31	0	100.567	6
46	609	1	513	1	941	1	IIIA	IIIA	56	4.2	0		2020-06-14	50.8333	2016-04-11	1	12.6333	2
47	727	2	652	1	960	1	IIB	IIB	59	4.5	1	2019-12-15	2019-12-15	44.4333	2016-04-21	0	140.767	8
48	529	1	428	1	700	1	IIB	IIB	41	9	0		2020-06-14	46.8667	2016-08-08	0	141.1	3
49	1150	2	1090	2	1260	2	IIA2	IIA2	46	4.5	0		2020-06-14	46.0667	2016-09-01	1	26.7667	6
50	796	2	659	1	979	1	IB1	IIIC1	33	0.5	0		2020-06-14	45.4333	2016-09-20	0	22.3	5
51	763	2	518	1	1250	2	IIA1	IIA1	49	3.5	0		2020-06-14	44.9667	2016-10-04	1	1	7
52	592	1	541	1	705	1	IVB	IVB	33	3.4	1	2019-04-01	2019-04-01	27.1667	2017-01-06	0	19.5	7
53	756	2	613	1	879	1	IIB	IIB	72	6.8	1	2018-05-05	2018-05-05	15.9667	2017-01-11	1	13.6	1
54	1020	2	959	2	1120	2	IB1	IB2	35	3	0		2020-06-14	40.8	2017-02-06	1	4.13333	3
55	827	2	657	1	1210	2	IIA2	IIA2	52	4.5	1	2019-11-15	2019-11-15	34.1667	2017-01-24	1	9.1	7
56	693	1	611	1	774	1	IB1	IB2	58	2	1	2018-07-30	2018-07-30	12	2017-08-04	1	60.4333	0
57	838	2	671	1	1280	2	IVB	IVB	45	5	1	2019-04-23	2019-04-23	18.5667	2017-10-13	1	10.0333	5
58	369	1	293	1	500	1	IIB	IIB	69	10	1	2019-06-15	2019-06-15	20.1333	2017-10-19	1	8.76667	2
59	475	1	384	1	761	1	IIA2	IIIC1	26	5	1	2009-07-28	2009-07-28	12.6333	2008-07-14	1	1.6	2
60	668	1	506	1	1140	2	IIA2	IIA2	40	4.5	0		2020-06-14	140.767	2008-11-21	1	15.0667	7
61	721	2	591	1	1050	2	IIA1	IIA1	55	3	0		2020-06-14	141.1	2008-11-11	1	12.9333	2
62	226	1	37	1	611	1	IIA1	IIA1	34	2.2	0		2020-06-14	22.3	2018-08-15	1	5.7	5
63	932	2	739	2	1107	2	IVB	IVB	55	12	1	2019-12-06	2019-12-06	15.4	2018-08-31	0	88.3	5
64	641	1	562	1	773	1	IB2	IB3	42	4.5	0		2020-06-14	19.5	2018-11-07	0	23.2667	2
65	1030	2	897	2	1290	2	IB1	IB2	33	3.5	0		2020-06-14	29.5667	2018-01-09	1	10.2667	6
66	680	1	594	1	851	1	IIA2	IIIC1	38	7	1	2019-03-21	2019-03-21	12.9333	2018-02-26	1	20.6	4
67	469	1	349	1	626	1	IIIB	IIIC2	46	8	1	2019-04-15	2019-04-15	11.7667	2018-04-27	0	17.4667	4
68	674	1	508	1	950	1	IVB	IVB	68	6	1	2019-01-06	2019-01-06	8.86667	2018-04-15	0	84.7667	1
69	470	1	344	1	611	1	IIA1	IIA1	63	3.5	0		2020-06-14	25.1	2018-05-23	0	17.1333	7
70	634	1	513	1	769	1	IVB	IVB	52	5	1	2019-02-01	2019-02-01	7.83333	2018-06-11	0	16.6333	4
71	1130	2	1030	2	1310	2	IB1	IIIC1	50	4.5	0		2020-06-14	23.2667	2018-07-17	0	84.4333	4
72	530	1	380	1	782	1	IIA2	IIA2	53	4.5	1	2016-09-12	2016-09-12	11.6667	2015-09-28	1	8.46667	2
73	632	1	490	1	1080	2	IIB	IIIC1	52	4.8	1	2020-04-23	2020-04-23	20.6	2018-08-14	0	5.63	6
74	702	2	504	1	1270	2	IIB	IIB	49	5	0		2020-06-14	17.4667	2019-01-07	0	10.2	5
75	1330	2	1240	2	1350	2	IIA1	IIA1	49	1.5	0		2020-06-14	17.1333	2019-01-17	0	5.03	8
76	802	2	485	1	1370	2	IIB	IIB	50	4.5	0		2020-06-14	16.6333	2019-02-01	1	7.96667	4
77	968	2	471	1	1270	2	IIB	IIIC1	61	3	0		2020-06-14	11.7667	2019-06-27	0	79.9	6
78	557	1	283	1	1060	2	IIA2	IIIC1	45	11.3	0		2020-12-07	5.63333	2020-06-21	1	27.3333	4
79	1610	2	1530	2	1680	2	IIA2	IIA2	52	4	0		2020-12-07	10.2	2020-02-05	1	55.8667	5
80	734	2	659	1	871	1	IIIB	IIIC	50	5	0		2020-12-07	5.03333	2020-07-09	0	10.87	6
81	737	2	495	1	1330	2	IIA2	IIIC	48	5	0		2020-12-07	14.9667	2019-09-15	0	10.8	6
82	1500	2	1470	2	1530	2	IIA1	IIA1	45	2.5	0		2020-12-07	10.8667	2020-01-16	0	76.6333	6
83	865	2	636	1	1210	2	IIA1	IIA1	60	3	0		2020-12-07	10.8	2020-01-18	0	75.7	9
